# Supplementary material
Source: publisher site journal article supplement (https://www.dovepress.com/article/584552)
Supplement: Supplementary file 1 [file 584552_Supplementary%20Material%201_1.docx]

### ****Supplementary Material 1****

### Search strategies for all databases

### ****1. PubMed****

#1 (systemic lupus erythematosus[MeSH Terms]) OR (lupus erythematosus, systemic[Title/Abstract]) OR (SLE[Title/Abstract]) OR (disseminated lupus erythematosus[Title/Abstract])

#2 (PERMA[Title/Abstract]) OR ("PERMA model"[Title/Abstract]) OR (positive psychology[MeSH Terms]) OR (positive psychology[Title/Abstract]) OR (positive psychology intervention[Title/Abstract])

#3 (fear[MeSH Terms]) OR (fear[Title/Abstract]) OR (fear of progression[Title/Abstract]) OR (fear of recurrence[Title/Abstract])

#4 #1 AND #2 AND #3

#5 #4 AND (article[Publication Type])

**2. Embase**

#1 'systemic lupus erythematosus'/exp OR 'lupus erythematosus systemic':ti,ab,kw OR 'sle':ti,ab,kw OR 'disseminated lupus erythematosus':ti,ab,kw

#2 'perma':ti,ab,kw OR 'perma model':ti,ab,kw OR 'positive psychology'/exp OR 'positive psychology':ti,ab,kw OR 'positive psychology intervention':ti,ab,kw

#3 'fear'/exp OR 'fear':ti,ab,kw OR 'fear of progression':ti,ab,kw OR 'fear of recurrence':ti,ab,kw

#4 #1 AND #2 AND #3

#5 #4 AND [article]/lim

**3. CINAHL**

#1 (MH "Lupus Erythematosus, Systemic") OR TI ( "systemic lupus erythematosus" OR SLE OR "disseminated lupus erythematosus" ) OR AB ( "systemic lupus erythematosus" OR SLE OR "disseminated lupus erythematosus" )

#2 TI ( PERMA OR "PERMA model" OR "positive psychology" OR "positive psychology intervention" ) OR AB ( PERMA OR "PERMA model" OR "positive psychology" OR "positive psychology intervention" ) OR SU ( "Positive Psychology" )

#3 (MH "Fear") OR TI ( fear OR "fear of progression" OR "fear of recurrence" ) OR AB ( fear OR "fear of progression" OR "fear of recurrence" )

#4 #1 AND #2 AND #3

#5 #4 AND PT article

**4.Web of Science**

#1 TS= ((systemic lupus erythematosus)/(lupus erythematosus,systemic)/(SLE)/(lupus erythematosus disseminates))

#2 TS= ((PERMA)/(PERMA model)/(positive psychology)/(positive psychology Intervention))

#3 TS= ((fear)/(fear of progression)/(fear of recurrence))

#4 DT=(Article)

#5 #1 AND #2 AND #3 AND #4

**5.Chinese Biomedical Literature Database (CBM)**

**#1 主题:("红斑狼疮, 系统性" OR "系统性红斑狼疮" OR "SLE") OR 常用字段:("系统性红斑狼疮" OR "SLE" OR "播散性红斑狼疮")**

**#2 主题:("积极心理学" OR "PERMA模型") OR 常用字段:("PERMA" OR "PERMA模型" OR "积极心理学" OR "积极心理学干预")**

**#3 主题:("恐惧") OR 常用字段:("恐惧" OR "疾病进展恐惧" OR "复发恐惧")**

**#4 #1 AND #2 AND #3**

**#5 #4 AND 文献类型:("文献")**

**6.China National Knowledge Infrastructure (CNKI)**

**(SU%='系统性红斑狼疮' + '红斑狼疮, 系统性' + 'SLE') AND (SU%='PERMA' + 'PERMA模型' + '积极心理学' + '积极心理干预') AND (SU%='恐惧' + '疾病进展恐惧' + '复发恐惧') AND (文献分类：医药卫生科技) (来源类别：学术期刊)**

**7.Wanfang Data**

**主题:("系统性红斑狼疮" OR "红斑狼疮 系统性" OR "SLE") * 主题:("PERMA" OR "PERMA模型" OR "积极心理学" OR "积极心理干预") * 主题:("恐惧" OR "疾病进展恐惧" OR "复发恐惧") (日期:-2024年5月) (文献类型:期刊论文)**

**8.VIP Database**

**(R=('系统性红斑狼疮' + 'SLE' + '播散性红斑狼疮')) * (R=('PERMA' + 'PERMA模型' + '积极心理学' + '积极心理干预')) * (R=('恐惧' + '疾病进展恐惧' + '复发恐惧')) (栏目：医药卫生) (期刊范围：全部期刊)**

### Search strategies for all databases in English version

### ****1. PubMed****

#1 (systemic lupus erythematosus[MeSH Terms]) OR (lupus erythematosus, systemic[Title/Abstract]) OR (SLE[Title/Abstract]) OR (disseminated lupus erythematosus[Title/Abstract])

#2 (PERMA[Title/Abstract]) OR ("PERMA model"[Title/Abstract]) OR (positive psychology[MeSH Terms]) OR (positive psychology[Title/Abstract]) OR (positive psychology intervention[Title/Abstract])

#3 (fear[MeSH Terms]) OR (fear[Title/Abstract]) OR (fear of progression[Title/Abstract]) OR (fear of recurrence[Title/Abstract])

#4 #1 AND #2 AND #3

#5 #4 AND (article[Publication Type])

**2. Embase**

#1 'systemic lupus erythematosus'/exp OR 'lupus erythematosus systemic':ti,ab,kw OR 'sle':ti,ab,kw OR 'disseminated lupus erythematosus':ti,ab,kw

#2 'perma':ti,ab,kw OR 'perma model':ti,ab,kw OR 'positive psychology'/exp OR 'positive psychology':ti,ab,kw OR 'positive psychology intervention':ti,ab,kw

#3 'fear'/exp OR 'fear':ti,ab,kw OR 'fear of progression':ti,ab,kw OR 'fear of recurrence':ti,ab,kw

#4 #1 AND #2 AND #3

#5 #4 AND [article]/lim

**3. CINAHL**

#1 (MH "Lupus Erythematosus, Systemic") OR TI ( "systemic lupus erythematosus" OR SLE OR "disseminated lupus erythematosus" ) OR AB ( "systemic lupus erythematosus" OR SLE OR "disseminated lupus erythematosus" )

#2 TI ( PERMA OR "PERMA model" OR "positive psychology" OR "positive psychology intervention" ) OR AB ( PERMA OR "PERMA model" OR "positive psychology" OR "positive psychology intervention" ) OR SU ( "Positive Psychology" )

#3 (MH "Fear") OR TI ( fear OR "fear of progression" OR "fear of recurrence" ) OR AB ( fear OR "fear of progression" OR "fear of recurrence" )

#4 #1 AND #2 AND #3

#5 #4 AND PT article

**4.Web of Science**

#1 TS= ((systemic lupus erythematosus)/(lupus erythematosus,systemic)/(SLE)/(lupus erythematosus disseminates))

#2 TS= ((PERMA)/(PERMA model)/(positive psychology)/(positive psychology Intervention))

#3 TS= ((fear)/(fear of progression)/(fear of recurrence))

#4 DT=(Article)

#5 #1 AND #2 AND #3 AND #4

**5.Chinese Biomedical Literature Database (CBM)**

**#1 Subject:("lupus erythematosus, systemic" OR "**systemic lupus erythematosus**" OR "SLE") OR Common fields:("**systemic lupus erythematosus**" OR "SLE" OR "**disseminated lupus erythematosus**")**

**#2 Subject:("**positive psychology**" OR "PERMA** model**") OR Common fields:("PERMA" OR "PERMA**m model**" OR "**positive psychology**" OR "**positive psychology intervention**")**

**#3 Subject:("**fear**") OR Common fields:("**fear**" OR "**fear of progression**" OR "**fear of recurrence**")**

**#4 #1 AND #2 AND #3**

**#5 #4 AND Publication type:("Articles")**

**6.China National Knowledge Infrastructure (CNKI)**

**(SU%='**systemic lupus erythematosus**' + '**(lupus erythematosus, systemic**' + 'SLE') AND (SU%='PERMA' + 'PERMA** model**' + '**positive psychology**' + '**positive psychology intervention**') AND (SU%='**fear**' + 'fear of progression' + 'fear of recurrence') AND (Literature classification: Medical and Health Sciences) (Source type: Academic journals)**

**7.Wanfang Data**

**Subject:("systemic lupus erythematosus" OR "**(lupus erythematosus, systemic**" OR "SLE") * Subject:("PERMA" OR "PERMA**model**" OR "positive psychology" OR "positive psychology intervention") * Subject:("**fear**" OR "fear of progression" OR "fear of recurrence") (Date: Up to May 2024) (Publication type: Articles)**

**8.VIP Database**

**(R=('systemic lupus erythematosus' + 'SLE' + '**disseminated lupus erythematosus**')) * (R=('PERMA' + 'PERMA** model**' + 'positive psychology' + 'positive psychology intervention')) * (R=('fear' + 'fear of progression' + 'fear of recurrence')) (Section: Medicine and Health) (Journal scope: All journals)**

#### **Supplementary Material 2**

#### **Theme 1: Exploring Positive Psychology**

Patients were introduced to the fundamental concepts of positive psychology through storytelling and PowerPoint presentations. This session aimed to guide patients in developing a rational cognitive framework for understanding systemic lupus erythematosus (SLE) and to foster a more positive attitude toward coping with the disease. Based on the principle of voluntary participation, patients were divided into small groups of **8–10 members**, and a **WeChat group** was established for each group to facilitate communication and support. The intervention facilitators regularly provided online guidance and responded to patients’ questions within the group. Participants were encouraged to record **“three good things”** each night in a personal diary and share them in the group chat throughout the intervention period. This daily reflective exercise aimed to reinforce positive cognitive patterns and establish a sustained feedback mechanism for promoting psychological well-being.

#### **Theme 2: Cultivating Positive Emotions**

Patients were systematically introduced to **ten core positive emotions**—joy, gratitude, serenity, interest, hope, pride, amusement, inspiration, awe, and love—through an interactive PowerPoint lecture. The purpose of this session was to help participants connect these emotions with their personal experiences and to stimulate their intrinsic positive emotional responses. A **group emotion-sharing session** was organized to encourage patients to share moments of positive emotions experienced during their medical journey, thereby fostering emotional resonance and empathy among group members. Additionally, the **“hot seat” group counseling technique** was introduced to facilitate deeper emotional awareness and enhance patients’ ability to perceive and express positive emotions effectively.

#### **Theme 3: Experiencing Engagement**

Patients were introduced to the concept of **“flow”**, defined as a state of complete absorption and enjoyment in an activity. They were encouraged to recall moments when they had experienced such immersion. Based on each patient’s physical condition and personal interests, individualized activities—such as reading, painting, or playing chess—were recommended to foster hobbies and promote sustained engagement. Techniques such as **progressive muscle relaxation** and **mindfulness meditation** were incorporated to help patients achieve focused immersion during specific activities. This process aimed to facilitate the effective integration of psychological resources, enhance concentration, and improve patients’ sense of self-efficacy.

#### **Theme 4: Enhancing Interpersonal Relationships**

This module focused on strengthening patients’ social connectedness and communication skills. Through lectures and **role-playing exercises**, patients were taught practical strategies for effective daily communication and interpersonal interaction. They were guided to identify and utilize **support resources** within their families, peer groups, and patient communities. The goal was to increase patients’ awareness and ability to both **seek and provide social support**, thereby fostering the development of a more comprehensive and sustainable social support network.

#### **Theme 5: Building the Belief in Overcoming the Disease**

In this module, patients were assisted in identifying their **top five character strengths** using a **personality strengths assessment tool**. Through a **“strengths bombardment”** activity, participants were encouraged to engage in mutual appreciation, helping deepen their self-awareness. The aim was to guide patients in transforming their character strengths into **internal psychological resources** for coping with the disease. This process was designed to build a belief system for disease coping that was grounded in each patient’s personal traits, reinforcing their resilience and fostering a positive outlook toward managing SLE.

#### **Theme 6: Pursuing Life's Value**

This module utilized **films with positive value orientations**, such as The Pursuit of Happyness and Send You a Little Red Flower, as intervention materials. Patients were encouraged to reflect on and share their viewing experiences, drawing connections between the films' themes and their personal circumstances. The goal was to help patients overcome difficulties, learn to love and appreciate, and explore the meaning of life in the face of adversity. By engaging with these positive narratives, patients were guided to reconstruct a positive life value system, promoting a sense of purpose and meaning in their lives despite the challenges posed by SLE.

#### **Theme 7: Achieving a Sense of Accomplishment**

In this module, patients were encouraged to share experiences within small groups, focusing on instances where they helped family members, friends, or even strangers. They were asked to discuss their proudest achievements and reflect on the feelings and insights gained from helping others. The aim was to foster a sense of **inner happiness** by highlighting the positive impact of their actions, thereby enhancing the patient’s sense of accomplishment and reinforcing the intrinsic value of contributing to others' well-being.

#### **Theme 8: Conclusion**

At the end of the intervention period, a **group summary meeting** was held, where each participant was invited to reflect on the gains made throughout the intervention. The session included a **gratitude ceremony** and the presentation of commemorative gifts to reinforce patients' positive emotional experiences. In addition, a **follow-up intervention plan** was developed to encourage patients to continue using the **“three good things”** journaling method, thereby integrating the positive psychological strategies learned during the intervention into their daily lives. This was intended to ensure the long-term retention and transfer of the intervention’s effects. The intervention lasted for **8 weeks**, with one session per week, each lasting no more than **90 minutes**. The intervention was facilitated through **WeChat group chats**, providing a platform for communication and ongoing support within the group.

The intervention facilitators were **rheumatology nurses with at least 5 years of experience**, all of whom received standardized training one week before the intervention to ensure consistency and adherence to the intervention protocols. A professional psychotherapist was also included in the team to provide systematic psychological counseling support to the patients.
